# Supplementary material
Source: publisher figshare collection journal article supplement (https://acs.figshare.com/ndownloader/files/24262398)
Supplement: Supplementary file 1 [file 24262398]

## **Supporting Information:**

# Prediction of Neuropeptides from Sequence Information Using Ensemble Classifier and Hybrid Features

Yannan Bin<sup>1,2</sup>, Wei Zhang<sup>1</sup>, Wending Tang<sup>1</sup>, Ruyu Dai<sup>1</sup>, Menglu Li<sup>2</sup>, Qizhi Zhu<sup>1</sup>, Junfeng Xia<sup>1,2\*</sup>

<sup>1</sup>Key Laboratory of Intelligent Computing and Signal Processing of Ministry of Education, Institutes of Physical Science and Information Technology, Anhui University, Hefei, Anhui 230601, China

<sup>2</sup>School of Computer Science and Technology, Anhui University, Hefei, Anhui 230601, China

E-mail: [jfxia@ahu.edu.cn](mailto:jfxia@ahu.edu.cn).

## Contents

|          |                                                                                                                                                 |               |
|----------|-------------------------------------------------------------------------------------------------------------------------------------------------|---------------|
| <b>1</b> | <b>Supporting Dataset</b>                                                                                                                       | <b>S-3</b>    |
| <b>2</b> | <b>Supporting Figures</b>                                                                                                                       | <b>S-4~7</b>  |
|          | Figure S1: Length distribution of 5,948 experimentally validated NPs in NeuroPep.                                                               | S-4           |
|          | Figure S2: Length distribution of sequences in positive and negative datasets.                                                                  | S-4           |
|          | Figure S3: Generation of binary profile.                                                                                                        | S-5           |
|          | Figure S4: Predictive performance comparison of different ML models with nine feature groups on training dataset with 10-fold cross-validation. | S-5           |
|          | Figure S5: The performances of base-learners using mRMR and SFS in term of ACC.                                                                 | S-6           |
|          | Figure S6: The performances of PredNeuroP with different cutoffs on the training dataset.                                                       | S-6           |
|          | Figure S7: The performances of PredNeuroP and the selected base-learners on the test dataset.                                                   | S-7           |
| <b>3</b> | <b>Supporting Tables</b>                                                                                                                        | <b>S-8~11</b> |
|          | Table S1 Overview of the nine feature groups                                                                                                    | S-8           |
|          | Table S2: Details of 12 AAindex properties in AAI features                                                                                      | S-9           |
|          | Table S3: Details of the five amino acid categories in features of GAAC, GDPC and GTPC                                                          | S-10          |
|          | Table S4: Details of the three amino acid categories in different physicochemical attributes for CTD feature                                    | S-10          |
|          | Table S5: Motifs in full, NT5 and CT5 sequences                                                                                                 | S-11          |
|          | Table S6: The performance comparison of PredNeuroP and NeuroPIpred on the validation dataset NeuroPIpred _VD                                    | S-11          |

## 1 Supporting Dataset

In order to compare the performances of PredNeuroP and NeuroPIpred on predicting the insect NPs, we used another validation dataset (named NeuroPIpred\_VD) downloaded from NeuroPIpred (only insect NPs, <https://webs.iiitd.edu.in/raghava/neuropipred/download.php>).<sup>1</sup> There are 175 positive insect NPs and 175 negative non-insect NPs in the validation dataset NeuroPIpred\_VD.

## References

1. Agrawal, P., et al., NeuroPIpred: a tool to predict, design and scan insect neuropeptides. *Scientific Reports*, **2019**, 9, 5129.

## 2 Supporting Figures

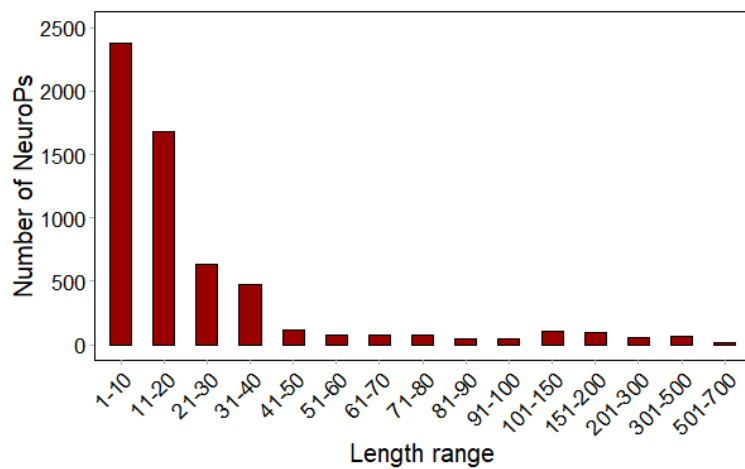

Figure S1: Length distribution of 5,948 experimentally validated NPs in NeuroPep database.

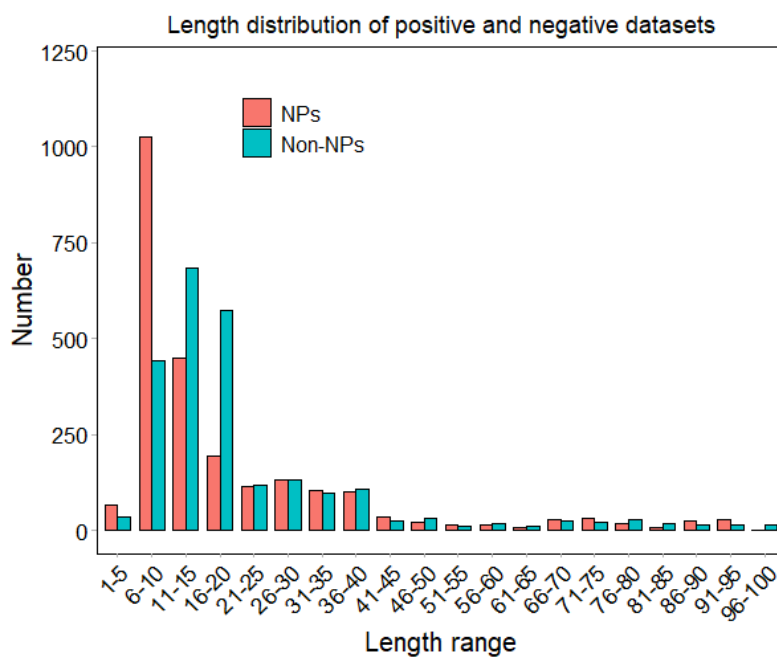

Figure S2: Length distribution of sequences in positive and negative datasets (2,425 NPs and non-NPs, respectively).

**NP sequence**

|   |   |   |   |   |   |   |   |   |   |   |   |
|---|---|---|---|---|---|---|---|---|---|---|---|
| S | T | R | V | M | A | H | L | P | L | R | L |
|---|---|---|---|---|---|---|---|---|---|---|---|

↓

**Binary profile**

|   | A | C | D | E | F | G | H | I | K | L | M | N | P | Q | R | S | T | V | W | T |
|---|---|---|---|---|---|---|---|---|---|---|---|---|---|---|---|---|---|---|---|---|
| S | 0 | 0 | 0 | 0 | 0 | 0 | 0 | 0 | 0 | 0 | 0 | 0 | 0 | 0 | 0 | 1 | 0 | 0 | 0 | 0 |
| T | 0 | 0 | 0 | 0 | 0 | 0 | 0 | 0 | 0 | 0 | 0 | 0 | 0 | 0 | 0 | 0 | 1 | 0 | 0 | 0 |
| R | 0 | 0 | 0 | 0 | 0 | 0 | 0 | 0 | 0 | 0 | 0 | 0 | 0 | 0 | 1 | 0 | 0 | 0 | 0 | 0 |
| V | 0 | 0 | 0 | 0 | 0 | 0 | 0 | 0 | 0 | 0 | 0 | 0 | 0 | 0 | 0 | 0 | 0 | 1 | 0 | 0 |
| M | 0 | 0 | 0 | 0 | 0 | 0 | 0 | 0 | 0 | 0 | 1 | 0 | 0 | 0 | 0 | 0 | 0 | 0 | 0 | 0 |
| A | 1 | 0 | 0 | 0 | 0 | 0 | 0 | 0 | 0 | 0 | 0 | 0 | 0 | 0 | 0 | 0 | 0 | 0 | 0 | 0 |
| H | 0 | 0 | 0 | 0 | 0 | 0 | 1 | 0 | 0 | 0 | 0 | 0 | 0 | 0 | 0 | 0 | 0 | 0 | 0 | 0 |
| L | 0 | 0 | 0 | 0 | 0 | 0 | 0 | 0 | 0 | 1 | 0 | 0 | 0 | 0 | 0 | 0 | 0 | 0 | 0 | 0 |
| P | 0 | 0 | 0 | 0 | 0 | 0 | 0 | 0 | 0 | 0 | 0 | 0 | 1 | 0 | 0 | 0 | 0 | 0 | 0 | 0 |
| L | 0 | 0 | 0 | 0 | 0 | 0 | 0 | 0 | 0 | 1 | 0 | 0 | 0 | 0 | 0 | 0 | 0 | 0 | 0 | 0 |
| R | 0 | 0 | 0 | 0 | 0 | 0 | 0 | 0 | 0 | 0 | 0 | 0 | 0 | 0 | 1 | 0 | 0 | 0 | 0 | 0 |
| L | 0 | 0 | 0 | 0 | 0 | 0 | 0 | 0 | 0 | 1 | 0 | 0 | 0 | 0 | 0 | 0 | 0 | 0 | 0 | 0 |

Figure S3 Generation of binary profile

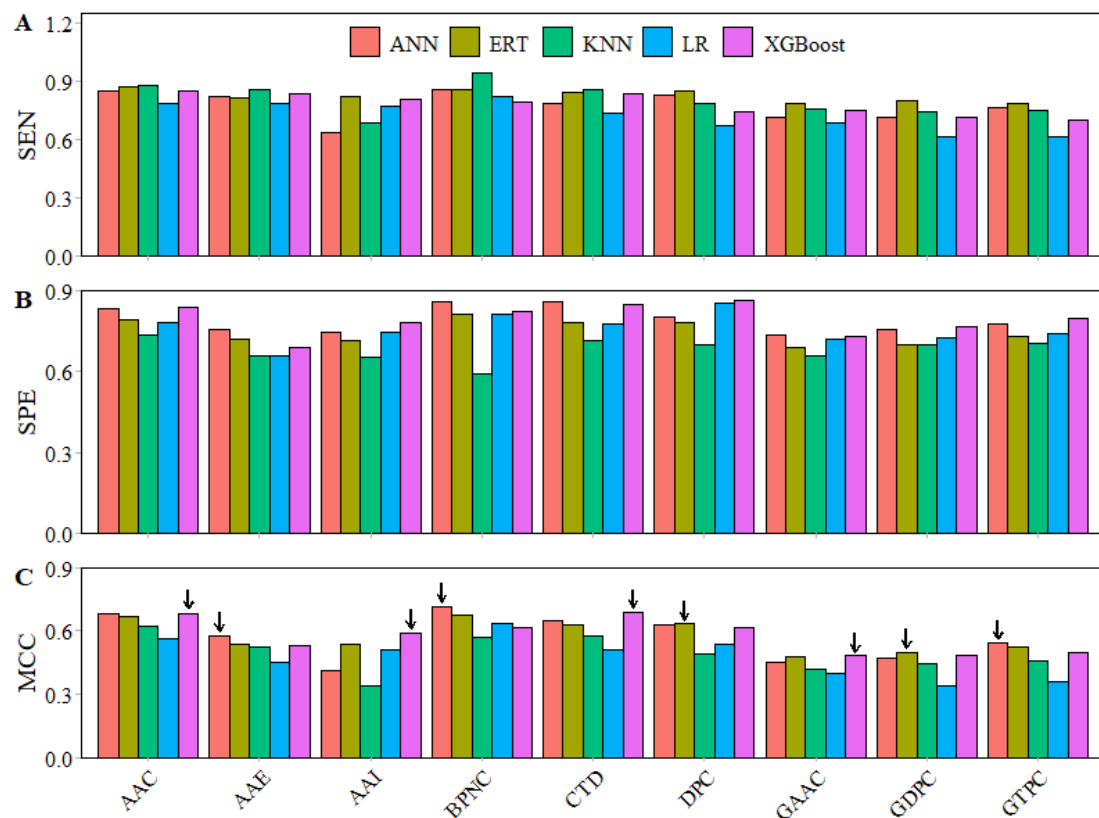

Figure S4: Predictive performance comparison of different ML models with nine feature groups on training dataset with 10-fold cross-validation. The arrow represents the highest-MCC of ML model in the feature group.

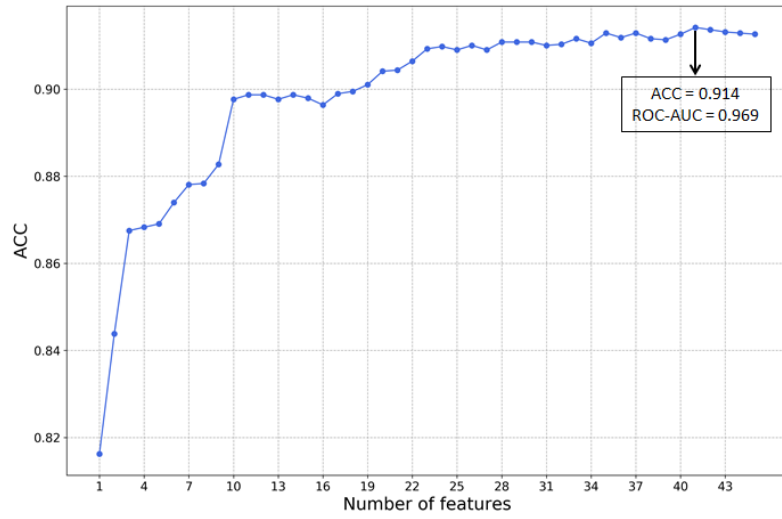

Figure S5: The performances of base-learners using mRMR and SFS in term of ACC.

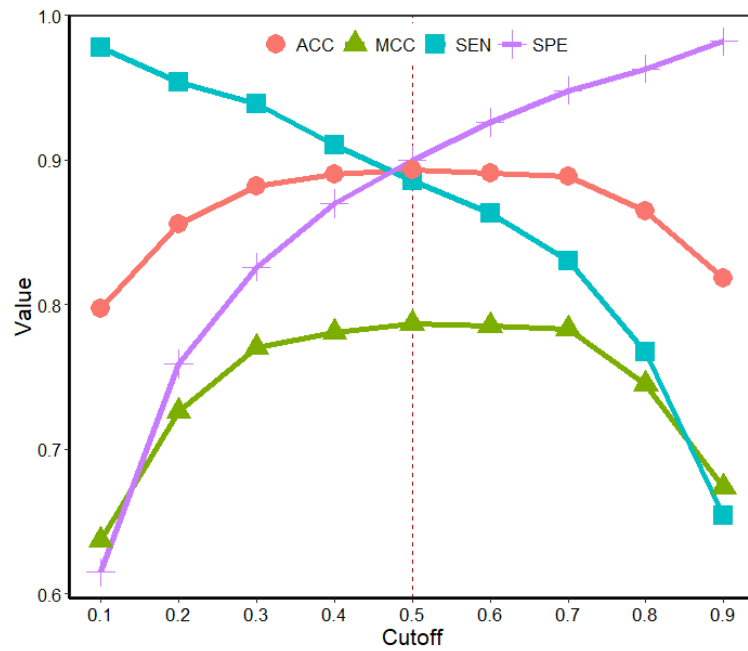

Figure S6: The performances of PredNeuroP with different cutoffs on the training dataset.

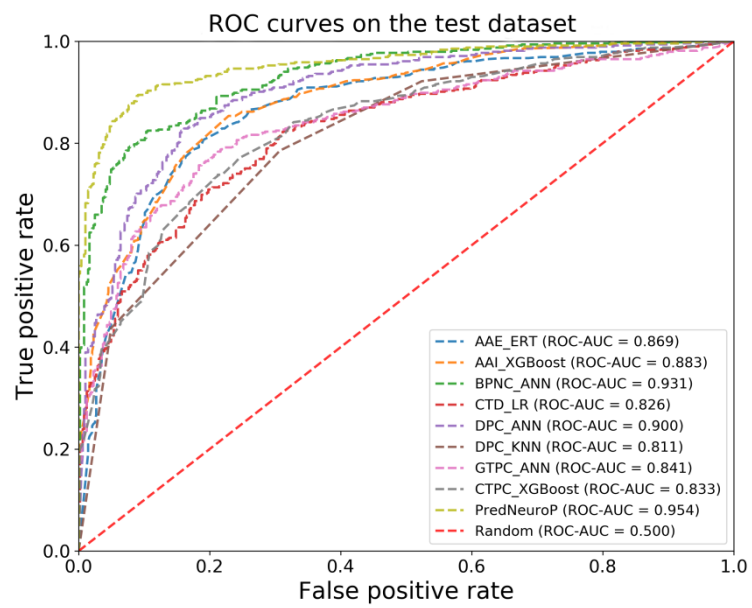

Figure S7: The performances of PredNeuroP and the selected base-learners on the test dataset.

### 3 Supporting Tables

Table S1: Overview of the nine feature groups

| Feature category                       | Feature name                                                    | Abbreviation | Dimension |
|----------------------------------------|-----------------------------------------------------------------|--------------|-----------|
| Composition-based feature              | Amino acid composition (full, NT5 and CT5 sequences*)           | AAC          | 60        |
|                                        | Dipeptide composition                                           | DPC          | 400       |
| Binary profile-based feature           | Binary profiling feature (NT5 and CT5 sequences)                | BPNC         | 200       |
|                                        | Amino acid index (full, NT5 and CT5 sequences)                  | AAI          | 36        |
|                                        | Grouped amino acid composition of (full, NT5 and CT5 sequences) | GAAC         | 15        |
| Physicochemical property-based feature | Grouped dipeptide composition                                   | GDPC         | 25        |
|                                        | Grouped tripeptide composition                                  | GTPC         | 125       |
|                                        | Composition-transition-distribution                             | CTD          | 147       |
| Position-based feature                 | Amino acid entropy (full, NT5 and CT5 sequences)                | AAE          | 60        |

\* NT5, the first 5 residues from N-terminus in peptide sequence; CT5, the last 5 residues from C-terminus in peptide sequence.



Table S2: Details of 12 AAindex properties in AAI features

| AAindex ID | Property         | Derivation                                                                                                                                                                                                                                                                                                                               |
|------------|------------------|------------------------------------------------------------------------------------------------------------------------------------------------------------------------------------------------------------------------------------------------------------------------------------------------------------------------------------------|
| EISD840101 | Hydrophobicity   | <p>For the property,</p> $C = \frac{1}{N} \sum_{n=1}^N AI_n$ <p>C is the average property (hydrophobicity, hydrophilicity, and so forth) of a given peptide, N is the length of the peptide, AI is the Index value for the property (hydrophobicity, hydrophilicity, and so forth) for the n<sup>th</sup> amino acid in the peptide.</p> |
| HOPT810101 | Hydrophilicity   |                                                                                                                                                                                                                                                                                                                                          |
| CHAM810101 | Steric parameter |                                                                                                                                                                                                                                                                                                                                          |
| EISD860101 | Solvation        |                                                                                                                                                                                                                                                                                                                                          |
| KYTJ820101 | Hydropathy       |                                                                                                                                                                                                                                                                                                                                          |
| MITS020101 | Amphiphilicity   |                                                                                                                                                                                                                                                                                                                                          |
| DAWD720101 | Size             |                                                                                                                                                                                                                                                                                                                                          |
| GRAR740102 | Polarity         |                                                                                                                                                                                                                                                                                                                                          |
| BIGC670101 | Residue volume   |                                                                                                                                                                                                                                                                                                                                          |
| FAUJ880109 | Hydrogen         | <p>For the property, <math>C = \sum_{n=1}^N AI_n</math>, C is the sum of Index values of all residues in the given peptide.</p>                                                                                                                                                                                                          |
| KLEP840101 | Net charge       |                                                                                                                                                                                                                                                                                                                                          |
| FASG760101 | Weight           |                                                                                                                                                                                                                                                                                                                                          |

Table S3: Details of the five amino acid categories in features of GAAC, GDPC and GTPC

| Physicochemical property | Amino acid       |
|--------------------------|------------------|
| Aliphatic group          | G, A, V, L, M, I |
| Aromatic group           | F, Y, W          |
| Positive charge group    | K, R, H          |
| Negative charged group   | D, E             |
| Uncharged group          | S, T, C, P, N, Q |

Tables S4: Details of the three amino acid categories in different physicochemical attributes for CTD feature

| Physicochemical property        | Group 1                | Group 2                                        | Group 3             |
|---------------------------------|------------------------|------------------------------------------------|---------------------|
| Hydrophobicity                  | R, K, E, D, Q, N       | G, A, S, T, P, H, T                            | C, V, I, L, M, F, W |
| Normalized Van der Waals volume | G, A, S, C, T, P, D    | N, V, E, Q, I, L                               | M, H, K, F, R, Y, W |
| Polarity                        | L, I, F, W, C, M, V, Y | P, A, I, G, S                                  | H, Q, R, K, N, E, D |
| Polarizability                  | G, A, S, D, T          | C, P, N, V, E, Q, I, L                         | K, M, H, F, R, Y, W |
| Charge                          | K, R                   | A, N, C, Q, G, H, I, L, M, F, P, S, T, W, Y, V | D, E                |
| Secondary structures            | E, A, L, M, Q, K, R, H | V, I, Y, C, W, F, T                            | G, N, P, S, D       |
| Solvent accessibility           | A, L, F, C, G, I, V, W | R, K, Q, E, N, D                               | M, P, S, T, H, Y    |

Table S5: Motifs in full, NT5 and CT5 sequences

| No. | NT5 sequence (Frequency) | CT5 sequence (Frequency) | Full sequence (Frequency) |
|-----|--------------------------|--------------------------|---------------------------|
| 1   | HAD (0.91%)              | MRF (3.96%)              | <b>FLRF</b> (3.63%)       |
| 2   | DEI (0.78%)              | <b>FLRF</b> (3.63%)      | <b>FMRF</b> (2.52%)       |
| 3   | HADG (0.78%)             | SFG (2.60%)              | <b>NFLRF</b> (2.23%)      |
| 4   | VNF (0.78%)              | <b>FMRF</b> (2.52%)      | <b>YSFG</b> (1.94%)       |
| 5   | YGGF (0.78%)             | IRF (2.35%)              | YSFGL (1.89%)             |
| 6   | CNT (0.66%)              | NFLR (2.27%)             | DFM (1.86%)               |
| 7   | QHW (0.66%)              | <b>NFLRF</b> (2.10%)     | DFMR (1.77%)              |
| 8   | QHWS (0.66%)             | SFGL (2.10%)             | DFMRF (1.77%)             |
| 9   | SDP (0.66%)              | YSF (1.98%)              | FGPR (1.53%)              |
| 10  | WSY (0.66%)              | <b>YSFG</b> (1.94%)      | AFGL (1.44%)              |

The common motifs in full and CT5 sequences are highlighted in bold.

Table S6: The performance comparison of PredNeuroP and NeuroPIpred on the validation dataset NeuroPIpred\_VD

| Tool        | SEN   | SPE   | ACC   | MCC   | ROC-AUC |
|-------------|-------|-------|-------|-------|---------|
| PredNeuroP  | 0.549 | 0.834 | 0.696 | 0.401 | 0.763   |
| NeuroPIpred | 0.823 | 0.851 | 0.837 | 0.670 | 0.910   |
